# Supplementary material for: Network-Based Integration of Disparate Omic Data To Identify "Silent Players" in Cancer
Source: PubMed Central journal article supplement (PMC4684294; doi:10.1371/journal.pcbi.1004595), 2015-12-18
Supplement: pcbi.1004595.s001.pdf [file pcbi.1004595.s001.pdf]

**Network-Based Integration of Disparate Omic Data  
To Identify “Silent Players” in Cancer  
(Supplementary Material)**

Matthew Ruffalo<sup>1</sup>, Mehmet Koyutürk\*<sup>1,2</sup>, and Roded Sharan\*<sup>3</sup>

<sup>1</sup>*Department of Electrical Engineering and Computer Science, Case Western Reserve University,  
Cleveland, OH, USA*

<sup>2</sup>*Center for Proteomics and Bioinformatics, Case Western Reserve University, Cleveland, OH, USA*

<sup>3</sup>*School of Computer Science, Tel Aviv University*

---

\*These authors contributed equally to this work.

**Gene**

---

*ABL1*  
*AHR*  
*AKT1*  
*ALKBH1*  
*ANXA1*  
*APOBEC3G*  
*AQP7*  
*AR*  
*ARAF*  
*ATF1*  
*ATM*  
*ATR*  
*AURKA*  
*BACH1*  
*BAD*  
*BAK1*  
*BARD1*  
*BAX*  
*BCL2*  
*BID*  
*BLM*  
*BMPR1A*  
*BMPR2*  
*BRAF*  
*BRCA1*  
*BRCA2*  
*CASP3*  
*CASP8*  
*CASP9*  
*CCNB1IP1*  
*CCND1*  
*CDC25A*  
*CDC25B*  
*CDC42*  
*CDH1*  
*CDK2*  
*CDK4*  
*CDK7*  
*CERK*  
*CHEK1*  
*CHEK2*  
*CHUK*  
*CREB1*  
*CSNK1D*  
*CTNNB1*  
*CYP19A1*  
*DAG1*  
*DCAKD*  
*DHTKD1*  
*E2F1*  
*EDAR*  
*EGFR*  
*EP300*  
*ERAL1*  
*ESR1*  
*FADD*  
*FAU*  
*FER*  
*FILIP1*  
*FOXO1*  
*GADD45A*

*GDI1*  
*GRIK1-AS2*  
*GRN*  
*GSK3A*  
*HDAC1*  
*HIPK2*  
*HMGCR*  
*IMPA1*  
*IRS1*  
*ITPKC*  
*JAK1*  
*JAKMIP1*  
*JUN*  
*KRAS*  
*LGALS13*  
*LOC100509620*  
*MAP3K13*  
*MAP3K7CL*  
*MAPK1*  
*MAX*  
*MDM2*  
*MMP1*  
*MRE11A*  
*MSH2*  
*MSH6*  
*MTOR*  
*MYC*  
*MYCBP2*  
*MYT1*  
*NAB1*  
*NCOA3*  
*NF1*  
*NFKB1*  
*NOXA1*  
*NUP85*  
*PAK1*  
*PHB*  
*PIAS1*  
*PIGR*  
*PIK3R2*  
*PKIA*  
*PLK1*  
*PLK3*  
*PML*  
*PTEN*  
*RAC1*  
*RAD50*  
*RAD51*  
*RAD54L*  
*RALA*  
*RALGAPA1*  
*RAP1A*  
*RASGEF1A*  
*RASGRP3*  
*RB1*  
*RHEB*  
*RHO*  
*RPP38*  
*RRAS*  
*SELK*  
*SIRT1*  
*SMAD1*

*SMAD2*  
*SMAD4*  
*SMAD6*  
*SMAD7*  
*SMARCA4*  
*SMEK1*  
*SMEK2*  
*SP1*  
*STAT1*  
*STK11*  
*TAB1*  
*TFPI*  
*TGFBR1*  
*TGFBR2*  
*TP53*  
*TPR*  
*TRADD*  
*TSC1*  
*TSC2*  
*UBE2F*  
*USP15*  
*USP16*  
*USP21*  
*USP38*  
*VEGFA*  
*WEE1*  
*XRCC3*  
*ZMIZ1*  
*ZMYND8*  
*ZNF655*

**Table A.** Genes contained in the integrated BRCA pathway.

| <b>Gene</b>   |
|---------------|
| <i>AKT1</i>   |
| <i>AKT2</i>   |
| <i>AKT3</i>   |
| <i>ARAF</i>   |
| <i>BRAF</i>   |
| <i>CALM1</i>  |
| <i>CALM2</i>  |
| <i>CALM3</i>  |
| <i>CALML3</i> |
| <i>CALML5</i> |
| <i>CALML6</i> |
| <i>CAMK2A</i> |
| <i>CAMK2B</i> |
| <i>CAMK2D</i> |
| <i>CAMK2G</i> |
| <i>CCND1</i>  |
| <i>CDK4</i>   |
| <i>CDK6</i>   |
| <i>CDKN1A</i> |
| <i>CDKN2A</i> |
| <i>E2F1</i>   |
| <i>E2F2</i>   |
| <i>E2F3</i>   |
| <i>EGF</i>    |
| <i>EGFR</i>   |
| <i>GRB2</i>   |
| <i>HRAS</i>   |

*IGF1*  
*IGF1R*  
*KRAS*  
*MAP2K1*  
*MAP2K2*  
*MAPK1*  
*MAPK3*  
*MDM2*  
*MTOR*  
*NRAS*  
*PDGFA*  
*PDGFB*  
*PDGFRA*  
*PDGFRB*  
*PIK3CA*  
*PIK3CB*  
*PIK3CD*  
*PIK3CG*  
*PIK3R1*  
*PIK3R2*  
*PIK3R3*  
*PIK3R5*  
*PLCG1*  
*PLCG2*  
*PRKCA*  
*PRKCB*  
*PRKCG*  
*PTEN*  
*RAF1*  
*RB1*  
*SHC1*  
*SHC2*  
*SHC3*  
*SHC4*  
*SOS1*  
*SOS2*  
*TGFA*  
*TP53*

**Table B.** Genes contained in the GBM KEGG pathway.
